# Supplementary material for: The demise of the world's largest piedmont glacier: a probabilistic forecast
Source: Copernicus journal article supplement (doi:10.5194/egusphere-2024-2354), 2024-08-14
Supplement: Supplementary file 1 [file egusphere-2024-2354-supplement.pdf]

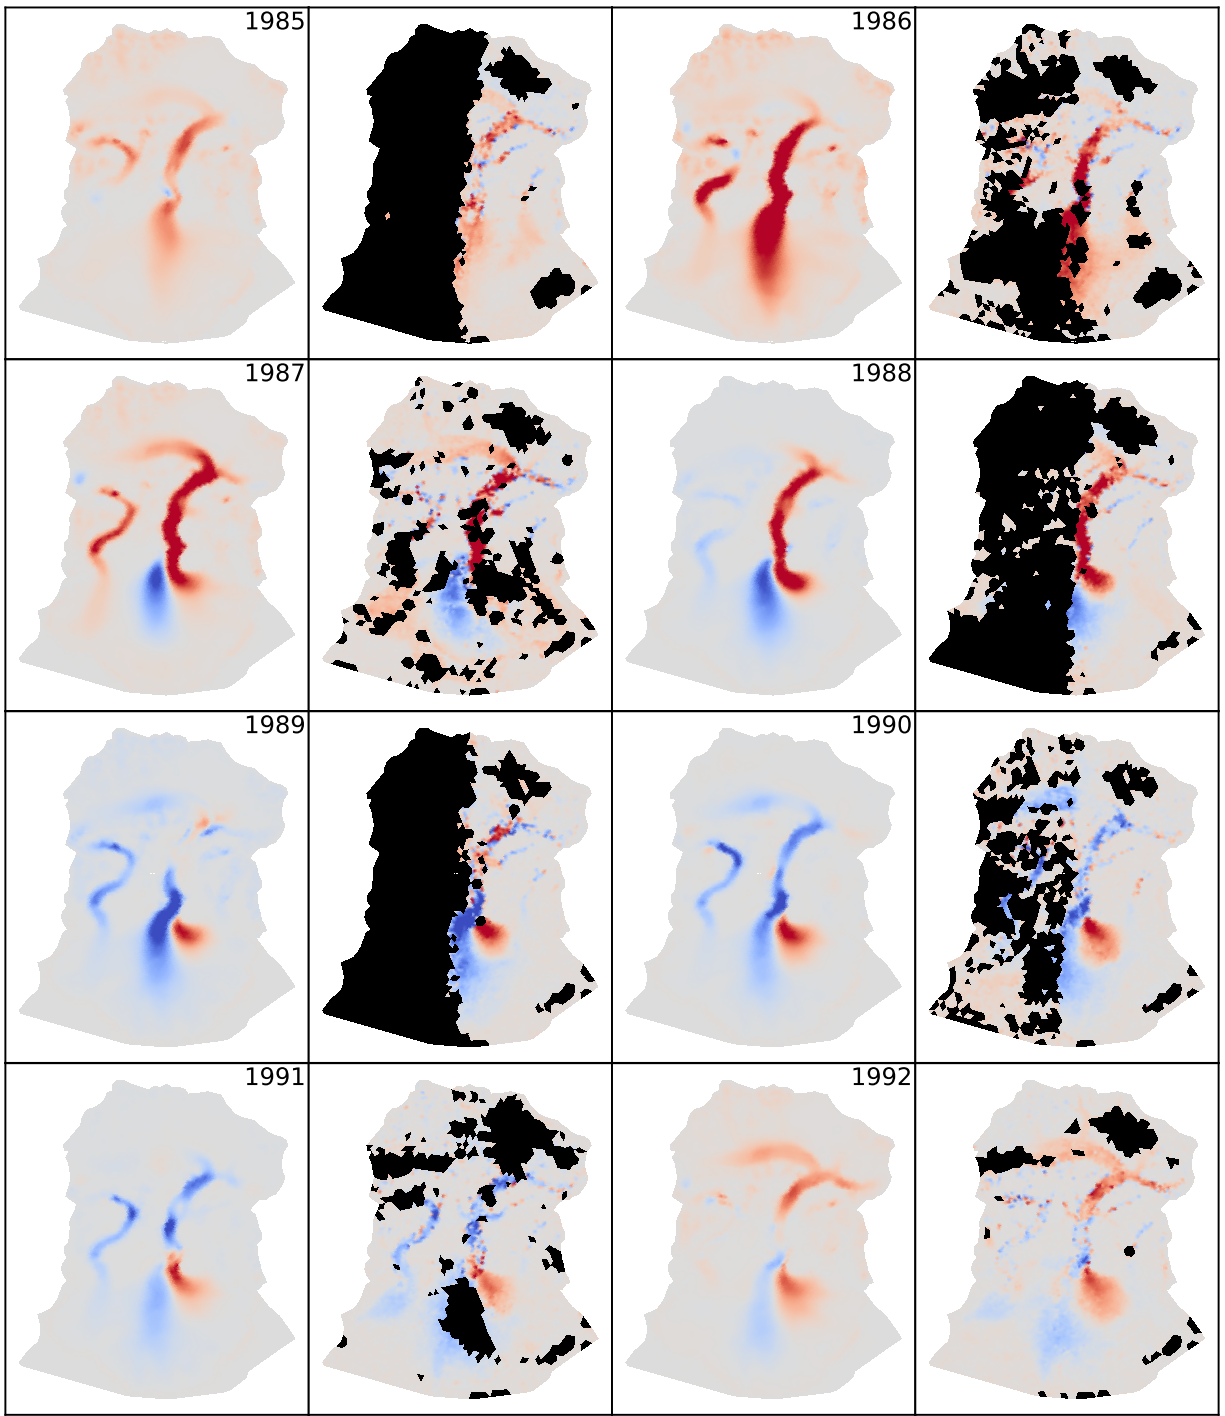

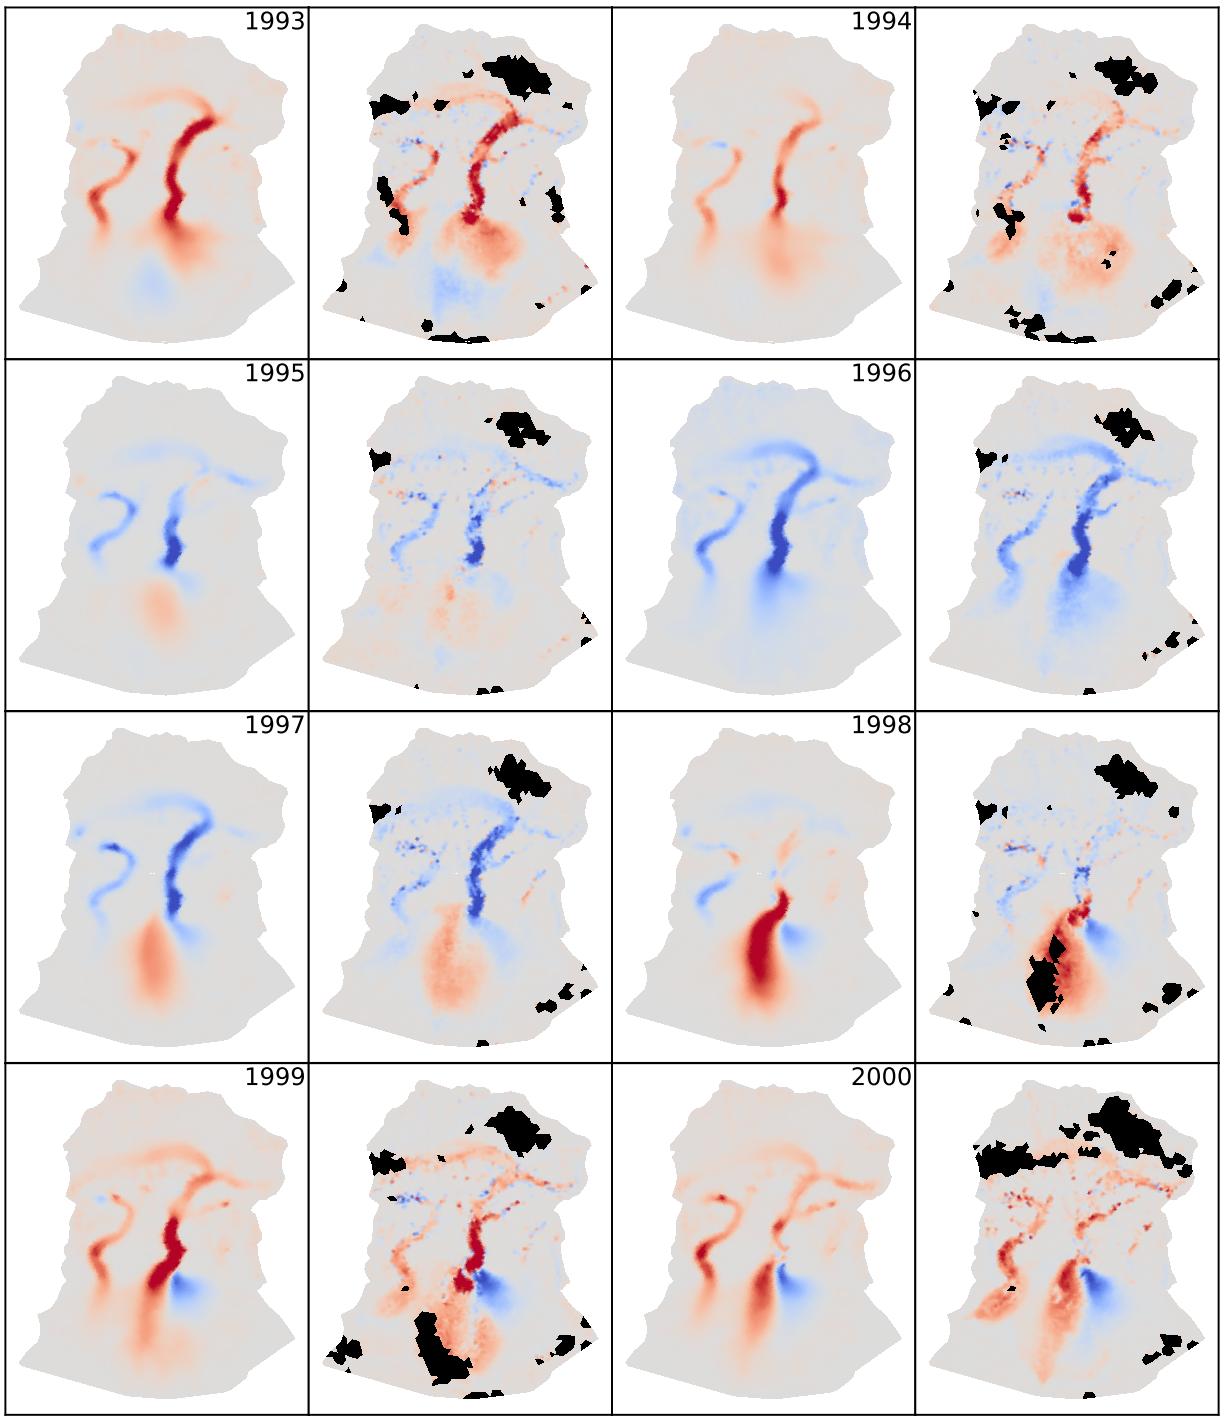

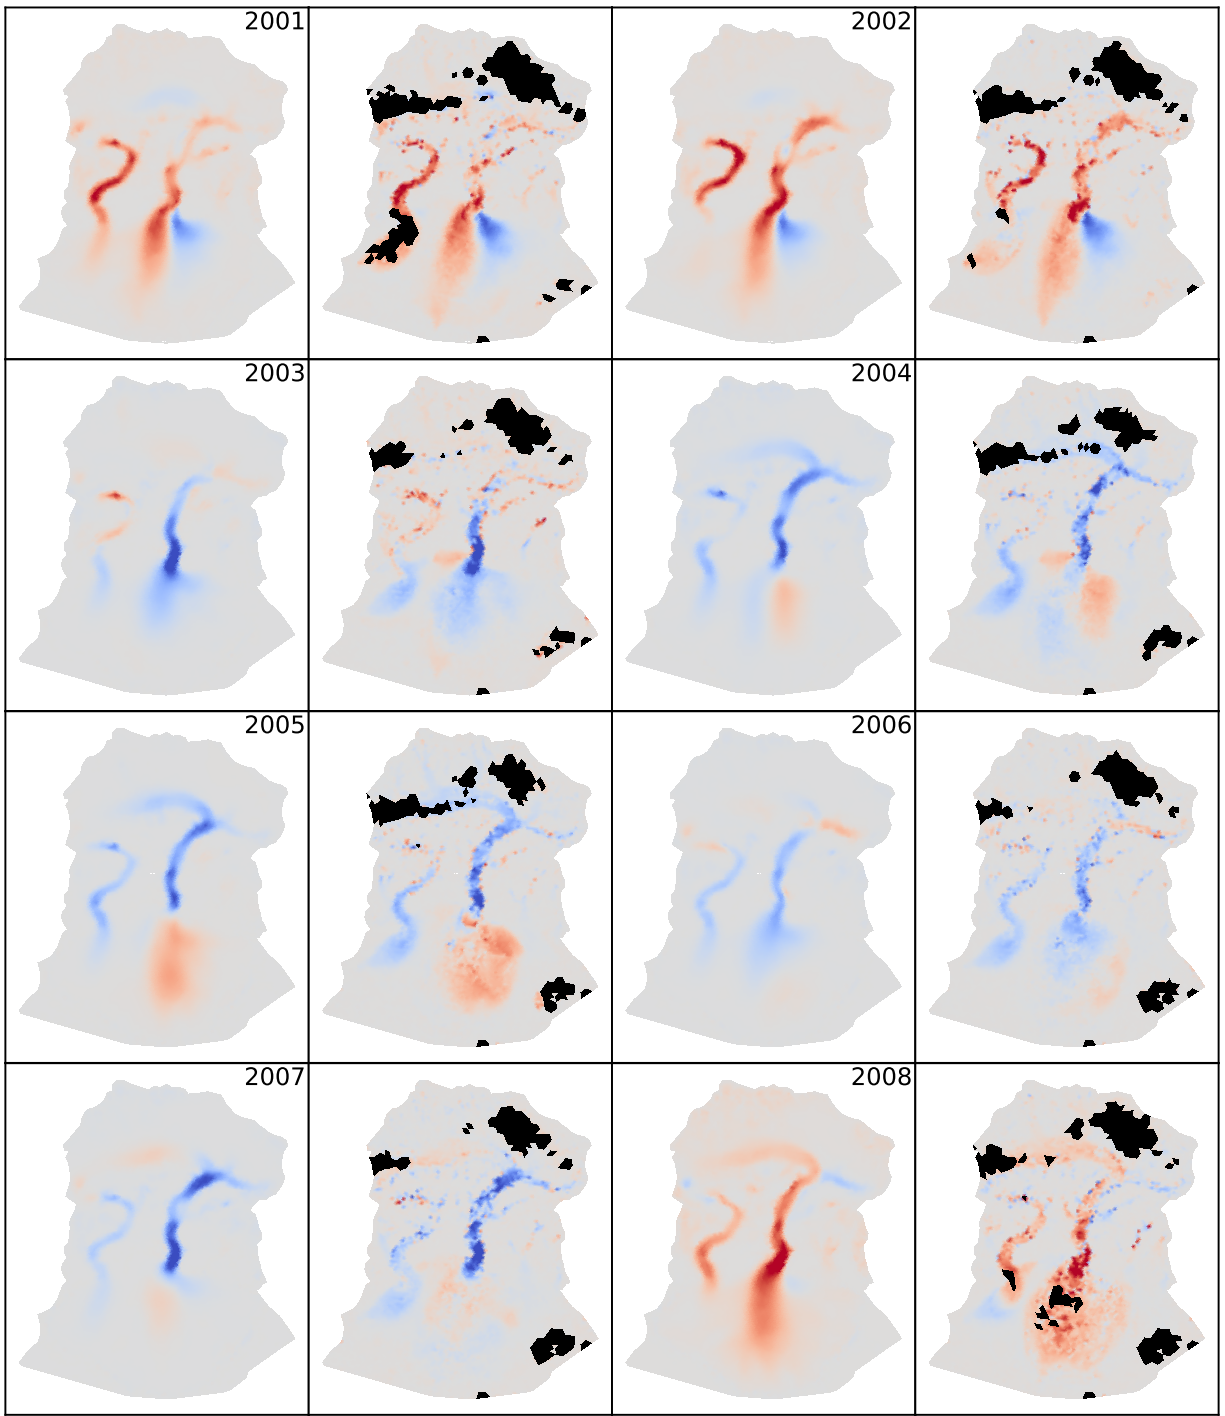

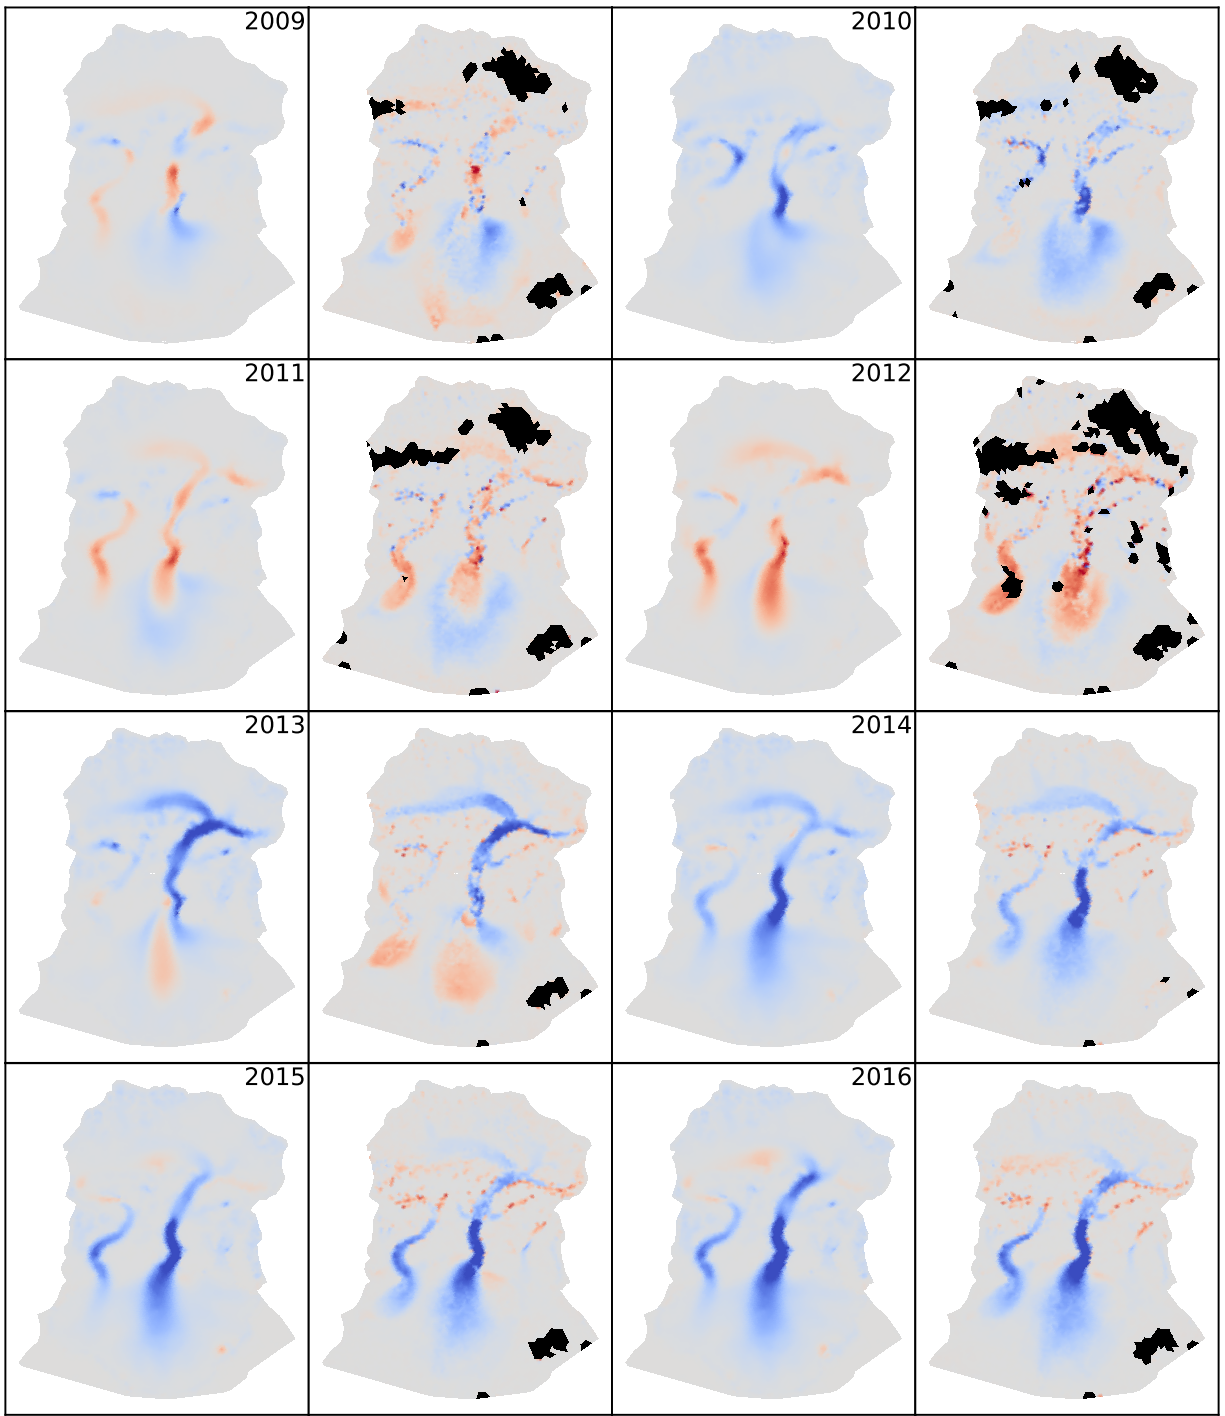

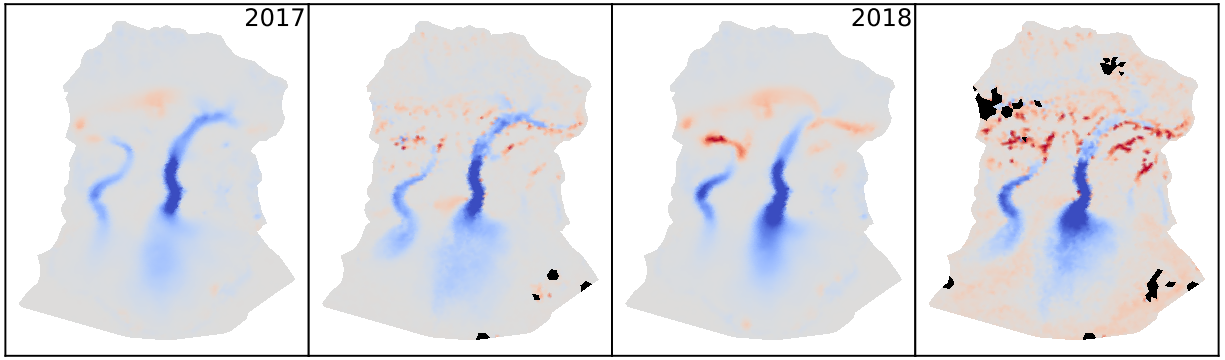

Fig. S1: Modelled (left) and observed (Right) ice speed anomalies for all years with a velocity observation. The color scale saturates at  $-200 \text{ m a}^{-1}$  and  $200 \text{ m a}^{-1}$ .
